# Supplementary material for: A Multi-Subject Tractography Atlas of Human Cerebellar Connections
Source: Research Square preprint supplement (doi:10.21203/rs.3.rs-9742595/v1), 2026-06-01
Supplement: Supplementary file 1 [file d5e783c2d8ec4e33b40d1963.xlsx]

## Sheet: Hoja 1
Criteria	5 points	4 points	3 points	2 points	1 point			Criteria / Tracts	CPH_L	CPH_R	CTC_L	CTC_R	DRTC_L	DRTC_R	FPC_L	FPC_R	GPA	ICP_L	ICP_R	MCP	OPC_R	OPC_L	OVC	PPC_L	PPC_R	SCP	SPNC_L	SPNC_R
Connectivity between anatomical regions	Clear anatomical regions for both origin and termination points, according to the literature.	Correct anatomical regions identified with minor extensions beyond the defined boundaries.	Only one anatomical region (either origin or termination) accurately matches the literature.	Approximates expected anatomical regions but with no clear pathway.	Neither anatomical region corresponds to those described in the literature.			Anatomical region connectivity	3	3	3	3	3	3	4	4	4	3	3	4	4	4	3	3	3	4	4	4
Trajectory between regions of interest (ROIS)	Trajectory is fully consistent with the literature in both direction and anatomical location.	Mostly accurate trajectory, showing minor spatial deviations from the expected course.	General similarity to the path, but with evident variations in specific segments of the trajectory.	Partially recognizable trajectory with major variations or structural inconsistencies.	No relation to the described anatomical trajectory in the literature.			Trajectory between regions of interest	4	4	3	3	3	3	4	4	3	3	3	4	4	4	2	4	4	4	4	4
Segmented ROIs for reconstruction	ROIs are precisely delineated and demonstrate high anatomical accuracy.	Correct segmentation with minor inaccuracies in delineation or boundary definition.	Identifiable ROIs, but with imprecise delineation or unintended overlapping of adjacent anatomical regions.	Significant anatomical errors in the ROI outlines.	Segmentation is mostly anatomically incorrect or fails to adhere to anatomical boundaries.			Segmented ROIs for reconstruction	hypothalamus ROI was a 3, Dentate nucleus was a 4	hypothalamus ROI was a 3, Dentate nucleus was a 4	Both dentate and red nuclei scored 4	Both dentate and red nuclei scored 4	thalamus ROI was a 3; dentate nucleus was a 4	thalamus ROI was a 3; dentate nucleus was a 4	MCP ROI was a 5; Frontal cortex ROI was a 4	MCP ROI was a 5; Frontal cortex ROI was a 4	4	5	5	5	MCP ROI is a 5, occipital cortex ROI was a 4	MCP ROI is a 5, occipital cortex ROI was a 4	4	MCP ROI is a 5; but parietal cortex ROI was a 4	MCP ROI is a 5; but parietal cortex ROI was a 4	5	IPC ROI was a 5; cerebellar cortex ROI was a 4	IPC ROI was a 5; cerebellar cortex ROI was a 4
Anatomical coherence along the pathway	Continuous tract morphology with high structural integrity and consistent fiber density along its trajectory.	Mostly continuous tract, exhibiting minor discontinuities or slight fiber splitting.	Identifiable fibers, but the tract appears moderately fragmented or dispersed outside the intended pathway.	Poor consistency, showing significant fragmentation or the presence of anatomically incorrect fibers.	No anatomical coherence; the tract lacks definition and cannot be reliably identified.			Anatomical coherence from one region to the other	4	4	3	3	3	3	5	5	4	3	3	5	5	5	2	4	4	5	5	5
Comments								Comments	hypothalamus ROI not precise- goes into the third ventricle; some false positive streamlines extending into optic tracts and other parts of hypothalamus (for example the mamillary bodies); false positives at the midbrain level, crossing the interpeduncular cistern	Same issue as CPH_L	streamlines not reaching cerebellar cortex; false positive strealines extended caudally down the brain stem; sparse streamlines reaching the frontal cortex	Same issue as CTC_L	Imprecise and sparse streamline projections to frontal and motor cortex; I don't think the thalamus ROI was precisely delineating the VIM & VL thalamus nucleus; false positive streamlines decussating at midbrain level	Same issue as DRTC_L	Some minor false positive streamlines	Same issue as FPC_L	note tracked using a single seed ROI with no inclusion ROI. Some false positive streamlines continued into the hypthalamus and third ventricle cranially, and down the brainstem caudally	some false positive streamlines extending into the 7th and 8th cranial nerve complex; also some false positive streamlines overlapping with the MCP cerebellar cortical projections	Same issue as ICP_L	some false positive streamlines extending into the 5th cranial nerve (trigerminal nerve)	Some false positive streamlines throughout	Same issue as OPC_R	Only a single (seed) ROI used . A lot of false positive streamlines that goes into the MCP, including projection motor fibres; streamlines not traversing through ICP so deviate from the anatomical description	Streamlines not reaching the cerebellar cortex; some false positive streamlines including the lower cranial nerves	Same issue as PPC_L	some false positive streamlines into the hypothalamus and into the third ventricle
								Mean	2026-08-03	2026-08-03	2026-03-03	2026-03-03	2026-03-03	2026-03-03	2026-04-04	2026-04-04	2026-08-03	2026-05-03	2026-05-03	2026-05-04	2026-04-04	2026-04-04	2026-08-02	2026-09-03	2026-09-03	2026-05-04	2026-04-04	2026-04-04
